# Supplementary material for: Time-dependent pharmacodynamics of amikacin on Mycobacterium abscessus growth and resistance emergence
Source: PubMed Central journal article supplement (PMC10846206; doi:10.1128/spectrum.03222-23), 2024-01-18
Supplement: spectrum.03222-23-s0001.pdf [file spectrum.03222-23-s0001.pdf]

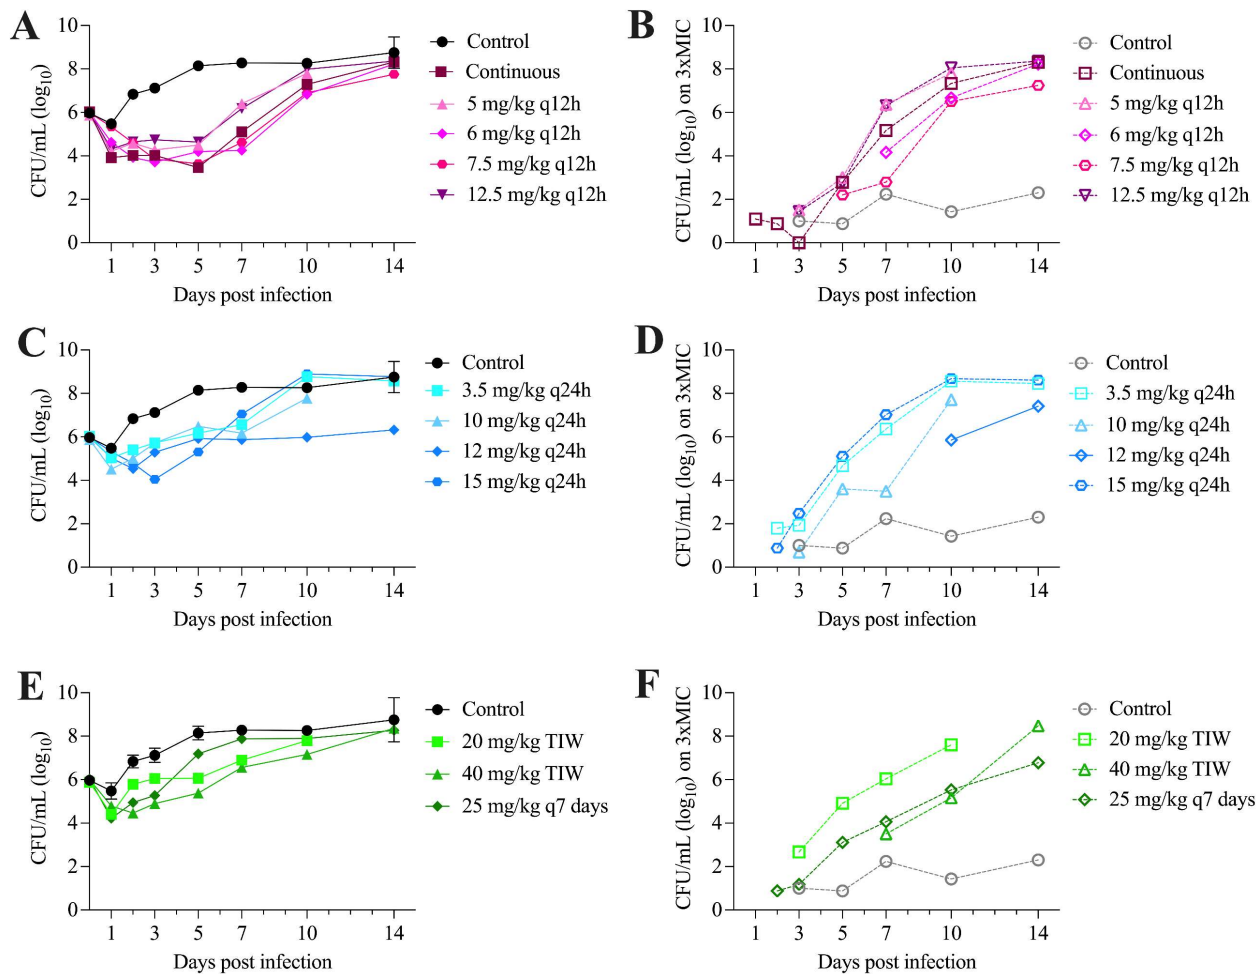

**Figure S1.** Growth of Mab in the HFIM with amikacin treatment. Colony forming units (CFU) on MH2 agar plates without (closed symbols, **A**, **C**, **E**) or with 3xMIC amikacin (open symbols/dashed lines, **B**, **D**, **F**) over 14 days. Amikacin was administered at different concentrations and dosing frequencies to approximate human pediatric doses with an infusion time of 30-60 minutes and half-life of 3 hours. Control arms did not receive antibiotic or vehicle. Amikacin dosing frequencies were grouped into  $<24$  hours (pink; continuous infusion,  $n=1$ , or every 12 hours, q12h,  $n=4$ ; **A**, **B**), every 24 hours (blue; q24h,  $n=4$ ; **C**, **D**), or  $>24$  hours (green; thrice weekly, TIW,  $n=2$ ; or every 7 days, q7 days,  $n=1$ ; **E**, **F**). During the early time points, resistant isolates were below the limit of detection in the quantity of bacteria plated on 3xMIC amikacin plates. Data shown in **B**, **D**, and **F** are only reported for resistant isolates that were above the threshold to allow quantification.

**Table S1.** Akaike information criterion scores for PK-PD indices corresponding to microbial kill

| <b>PK-PD parameter</b> | <b><math>\Delta</math>CFU<sub>max</sub></b> | <b>Day 1</b> | <b>Day 2</b> | <b>Day 3</b> | <b>Day 5</b> | <b>Day 7</b> | <b>Day 10</b> | <b>Day 14</b> |
|------------------------|---------------------------------------------|--------------|--------------|--------------|--------------|--------------|---------------|---------------|
| %T>MIC                 | 24.2                                        | 22           | 20.7         | 29.7         | 33.4         | 36.7         | 35.6          | 33.3          |
| AUC:MIC                | 36.3                                        | NC           | 24.4         | NC           | 40.6         | NC           | NC            | NC            |
| Peak:MIC               | NC                                          | NC           | NC           | NC           | NC           | NC           | NC            | NC            |

Notes: Values shown are the Akaike information criterion (AIC) score at each timepoint based on non-linear regression analysis of delta CFU with an inhibitory Emax model. Lower AIC represent the more likely model. NC = no convergence of the model and unable to calculate AIC.

**Table S2.** Validation of amikacin assay for amikacin sulfate in MH2 broth

| <b>Standard<br/>(<math>\mu\text{g/mL}</math>)*</b> | <b>Tube 1</b> | <b>Tube 2</b> | <b>Accuracy (%)</b> |
|----------------------------------------------------|---------------|---------------|---------------------|
| 0                                                  | <1.35         | <1.35         | -                   |
| 3.75                                               | 3.85          | 3.89          | <b>103.20</b>       |
| 15                                                 | 15.75         | 15.17         | <b>103.07</b>       |
| 30                                                 | 27.59         | 29.31         | <b>94.83</b>        |

\*Concentration of free amikacin from amikacin sulfate diluted in MH2

**Table S3.** Measured free amikacin concentrations on day 7 for each dosing regimen

| Frequency   | Equivalent Daily Dose | Target Cmax (µg/mL) | Measured Cmax (µg/mL) | Accuracy (%) | Target trough (µg/mL) | Measured Trough (µg/mL) | Accuracy (%) |
|-------------|-----------------------|---------------------|-----------------------|--------------|-----------------------|-------------------------|--------------|
| No amikacin | Untreated             | 0                   | <1.35                 | -            | 0                     | <1.35                   | -            |
| Continuous  | 20 mg/kg              | 15                  | 13.48                 | 89.9         | 15                    | 13.90                   | 92.7         |
| q12h        | 10 mg/kg              | 20.3                | 21.3                  | 104.9        | 1.4                   | 1.9                     | 135.7        |
| q12h        | 12 mg/kg              | 22.3                | 20.0                  | 89.6         | 1.6                   | 2.2                     | 137.5        |
| q12h        | 15 mg/kg              | 23.3                | 17.5                  | 75.1         | 1.8                   | 1.9                     | 104.4        |
| q12h        | 25 mg/kg              | 50.5                | 40.51                 | 80.2         | 3.6                   | 6.09                    | 169.2        |
| q24h        | 3.5 mg/kg             | 12.6                | 9.54                  | 75.7         | 0.1                   | <1.35                   | -            |
| q24h        | 10 mg/kg              | 40.1                | 39.5                  | 98.5         | 0                     | <1.35                   | -            |
| q24h        | 12 mg/kg              | 45.7                | 42.0                  | 91.9         | 0                     | <1.35                   | -            |
| q24h        | 15 mg/kg              | 52.5                | 40.9                  | 77.9         | 0                     | <1.35                   | -            |
| TIW         | 20 mg/kg              | 71.2                | 69.2                  | 97.2         | 0                     | <1.35                   | -            |
| TIW         | 40 mg/kg              | 149.6               | 138.0                 | 92.2         | 0                     | <1.35                   | -            |
| q7 days     | 25 mg/kg              | 90                  | 77.28                 | 85.9         | 0                     | <1.35                   | -            |
